# Supplementary material
Source: HighWire-hosted journal article supplement (https://rc.rcjournal.com/highwire/filestream/23978/field_highwire_adjunct_files/1/rc-09925-File002.docx)
Supplement: rc-09925-File002.docx [file rc-09925-File002.docx]

**Table SM2 – Organ failures during intensive care unit stay.**

|  | **Overall**  **(N=326)** |
| --- | --- |
| Cardiovascular Failure |  |
| No | 84 (25.8%) |
| Yes | 242 (74.2%) |
| Liver Failure |  |
| No | 291 (89.3%) |
| Yes | 35 (10.7%) |
| Renal Failure |  |
| No | 193 (59.2%) |
| Yes | 133 (40.8%) |
| Coagulation Failure |  |
| No | 284 (87.1%) |
| Yes | 42 (12.9%) |
| Central Nervous System Failure |  |
| No | 288 (88.3%) |
| Yes | 38 (11.7%) |
| Respiratory Failure |  |
| No | 77 (23.6%) |
| Yes | 249 (76.4%) |
